# Supplementary material for: A Si@SiOC@Li2Si2O5 anode derived from pyrolysis of polysiloxane enables lithium-ion batteries to exhibit high electrochemical performance and high initial coulombic efficiency
Source: Royal Society of Chemistry journal article supplement (doi:10.1039/d4ta01878h), 2024-01-01
Supplement: d4ta01878h1.pdf [file d4ta01878h1.pdf]

**A Si@SiOC@Li<sub>2</sub>Si<sub>2</sub>O<sub>5</sub> Anode Derived from Pyrolysis of Polysiloxane  
Enables Lithium-ion Batteries with High Electrochemical  
Performance and High Initial Coulombic Efficiency**

Longsheng Li, Yue Zhang, Wen Chen, Wei Yang, Hanbo Zou, Tianxing Kang\*,  
Shengzhou Chen\*

College of Chemistry and Chemical Engineering, Guangzhou University, Guangzhou  
510006, Guangdong, China;

\*Corresponding author,

E-mail address: [txkang@gzhu.edu.cn](mailto:txkang@gzhu.edu.cn); Phone: +86-15521164893

E-mail address: [szchen@gzhu.edu.cn](mailto:szchen@gzhu.edu.cn); Phone: +86-13342884267

Address: Guangzhou University, 230 Waihuan West Road, Fanyu District, Guangzhou  
510006, Guangdong Province, China

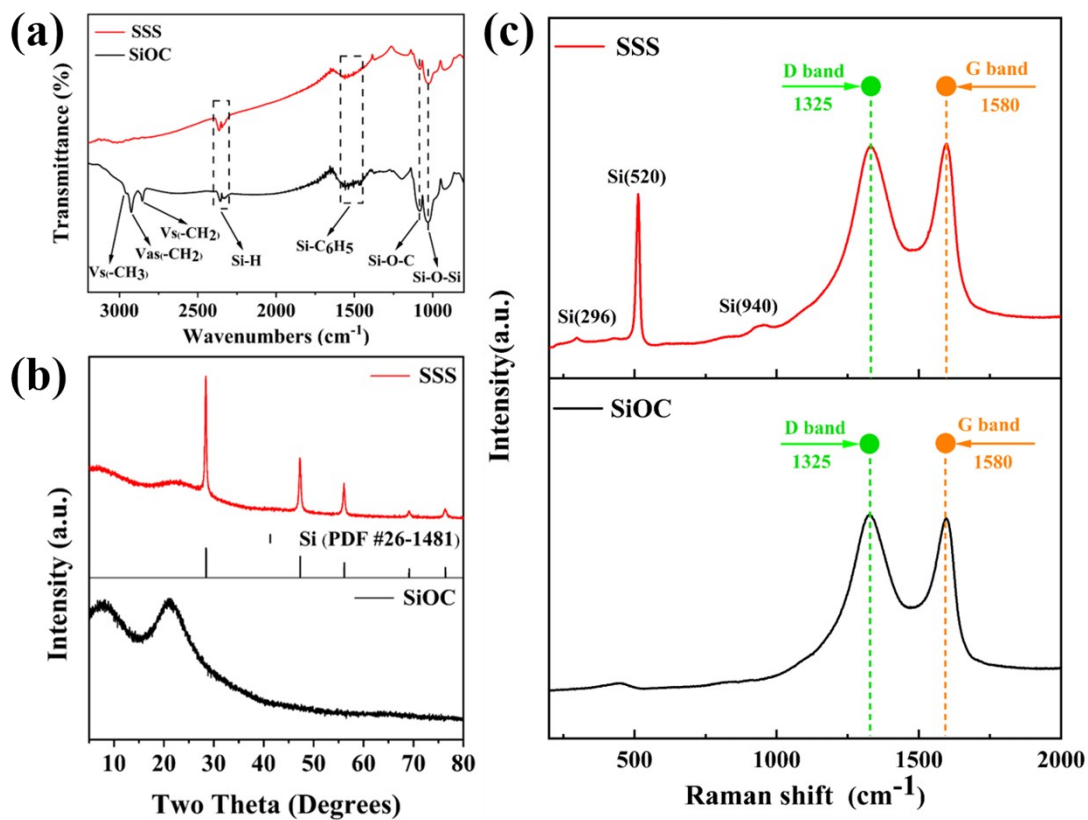

Figure S1. (a) FT-IR spectra of the SiOC and SSS. (b) XRD patterns of the SiOC and SSS. (c) Raman spectra of the SiOC and SSS.

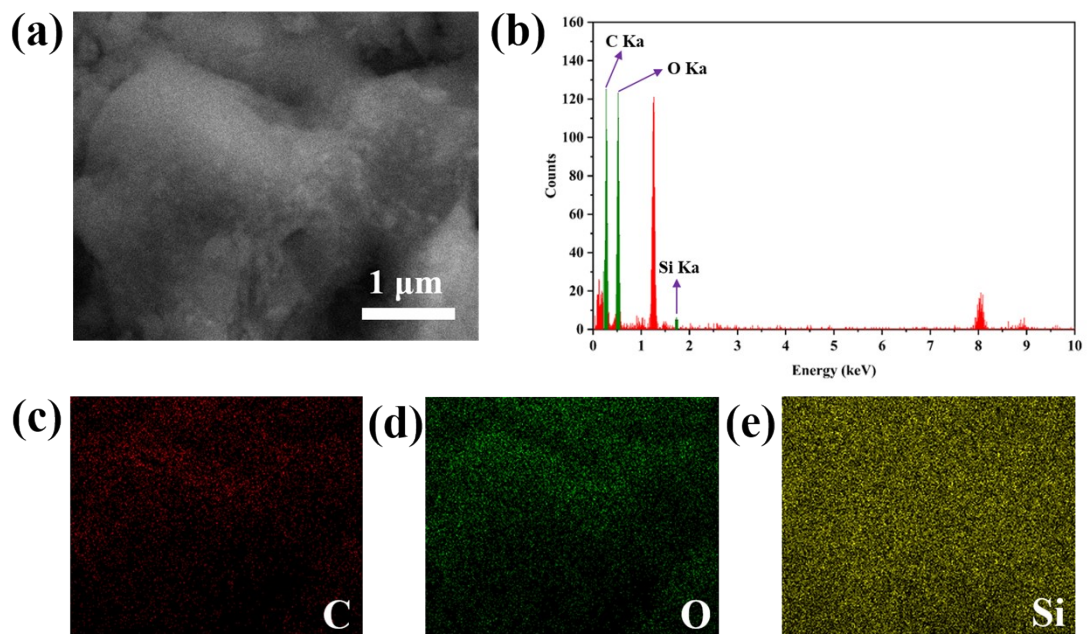

Figure S2. Element distribution spectra of the SSL.

Table S1. Electrochemical performance of SiOC-based composites.

| Sample (current density<br>mA g <sup>-1</sup> )                             | First<br>reversible<br>capacity<br>(mAh g <sup>-1</sup> ) | ICE(%) | Reversible<br>capacity<br>(after N<br>cycles) | Reference                                       |
|-----------------------------------------------------------------------------|-----------------------------------------------------------|--------|-----------------------------------------------|-------------------------------------------------|
| <b>Pure SiOC</b>                                                            |                                                           |        |                                               |                                                 |
| SiOC-Ar (36)                                                                | 760                                                       | 50     | >400 (100)                                    | Graczyk-zajac et al. 2018 (ref. 1) <sup>1</sup> |
| SiOC-DVB-1 (100)                                                            | 819                                                       | 65     | 476 (500)                                     | Wu et al. 2022 (ref. 2) <sup>2</sup>            |
| SiOC-500 (100)                                                              | 578                                                       | 57     | 351 (200)                                     | Xia et al. 2020 (ref. 3) <sup>3</sup>           |
| <b>Carbon based SiOC composites</b>                                         |                                                           |        |                                               |                                                 |
| SiOC:C nanohybrids (50)                                                     | 436                                                       | 54     | 470 (50)                                      | Wang et al. 2015 (ref. 4) <sup>4</sup>          |
| SiOC/C NF-0.5(100)                                                          | 1011                                                      | 68     | 707 (200)                                     | Huang et al. 2021 (ref. 5) <sup>5</sup>         |
| Onion-like SiOC/C (100)                                                     | 658                                                       | 78     | 540 (50)                                      | Lin et al. 2022 (ref. 6) <sup>6</sup>           |
| <b>Graphite based SiOC composites</b>                                       |                                                           |        |                                               |                                                 |
| SiOC/graphite (SG)(50)                                                      | 580                                                       | 71     | 480 (1000)                                    | Wu et al. 2019 (ref. 7) <sup>7</sup>            |
| NCG@SiOC (372)                                                              | 520                                                       | 72     | 300 (1000)                                    | Hong et al. 2021 (ref. 8) <sup>8</sup>          |
| SiOCPhTES/C10g (186)                                                        | 452                                                       | 54     | 293 (20)                                      | Knozowski et al. 2020 (ref. 9) <sup>9</sup>     |
| <b>Graphene oxide/reduced graphene oxide/graphene based SiOC composites</b> |                                                           |        |                                               |                                                 |
| SiOC@C/graphene(200)                                                        | 674                                                       | 62     | 691 (100)                                     | Ma et al. 2022 (ref. 10) <sup>10</sup>          |
| 3D GNS SiOC (100)                                                           | 844                                                       | 66     | 701 (100)                                     | Sang et al. 2018 (ref. 11) <sup>11</sup>        |
| NGA SiOC 25 (37)                                                            | 747                                                       | 67     | 605 (90)                                      | Shao et al. 2020 (ref. 12) <sup>12</sup>        |
| <b>Si/SiOC composites</b>                                                   |                                                           |        |                                               |                                                 |
| SiOC. N-Si-a (74)                                                           | 704                                                       | -      | 620 (100)                                     | Kaspar et al. 2014 (ref. 13) <sup>13</sup>      |
| Site:SiOC (-)                                                               | 593                                                       | 65     | 289 (50)                                      | Vrankovic et al. 2017 (ref. 14) <sup>14</sup>   |
| Si/SiOC-0.6 (100)                                                           | 980                                                       | 63     | 800 (100)                                     | Wu et al. 2019 (ref. 15) <sup>15</sup>          |
| <b>Sn/SiOC composites</b>                                                   |                                                           |        |                                               |                                                 |
| 1.1 Sn- SiOCfiber                                                           | 939                                                       | 82     | 457 (100)                                     | Tolosa et al. 2018 (ref. 16) <sup>16</sup>      |
| Sn@SiOC NPs (186)                                                           | 656                                                       | 67     | 411 (250)                                     | Xia et al. 2020 (ref. 17) <sup>17</sup>         |
| SiOC:C0.2/Sn-40% (100)                                                      | 439                                                       | 56     | 351 (100)                                     | Knozowski et al. 2022 (ref. 18) <sup>18</sup>   |
| <b>This work</b>                                                            |                                                           |        |                                               |                                                 |
| Si@SiO <sub>x</sub> (500)                                                   | 2773                                                      | 87     | 0 (80)                                        |                                                 |
| SSL (500)                                                                   | 983                                                       | 73     | 733 (500)                                     |                                                 |
| SiOC (500)                                                                  | 639                                                       | 55     | 205 (500)                                     |                                                 |
| SSS (500)                                                                   | 1082                                                      | 70     | 170 (500)                                     |                                                 |

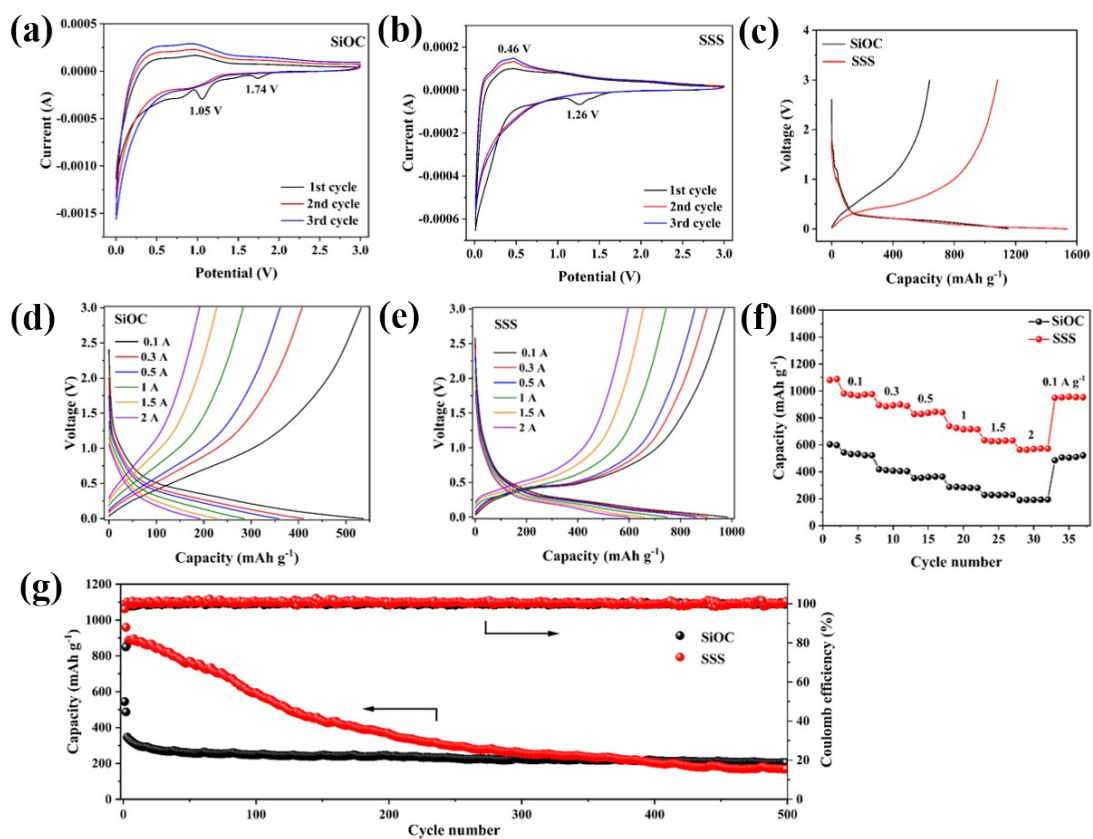

Figure S3. The CV curves for the initial three cycles of (a)SiOC, (b) SSS between 3.0 and 0.001 V (vs. Li/Li<sup>+</sup>) at a scan rate of 0.1 mV s<sup>-1</sup>. (c) ICE the SiOC and SSS anodes. Charge/discharge voltage profiles of (d) SiOC, (e) SSS electrodes at specific current values from 0.1 to 2 A g<sup>-1</sup>. (f) Rate performance of the SiOC and SSS anodes. (g) Cycling performance of SiOC and SSS electrodes at 0.5 A g<sup>-1</sup>.

Table S2.  $R_{ct}$  and  $R_s$  values for Si@SiO<sub>x</sub>, SSL, SiOC and SSS electrodes in EIS tests.

| Electrode material         | $R_{ct}/\Omega$ | $R_s/\Omega$ |
|----------------------------|-----------------|--------------|
| Si@SiO <sub>x</sub> -1st   | 28.95           | 3.885        |
| SSL-1st                    | 6.132           | 3.573        |
| Si@SiO <sub>x</sub> -500th | 18.02           | 15.35        |
| SSL-500th                  | 9.322           | 10.71        |
| SiOC-1st                   | 35.39           | 3.541        |
| SSS-1st                    | 15.64           | 3.109        |

Table S3.  $R_{ct}$  and  $R_s$  values of SSL electrodes over 500 cycles.

| Number of cycles | $R_{ct}/\Omega$ | $R_s/\Omega$ |
|------------------|-----------------|--------------|
| After 1 cycle    | 6.132           | 3.573        |
| After 10 cycles  | 7.52            | 4.759        |
| After 20 cycles  | 6.597           | 3.72         |
| After 50 cycles  | 7.336           | 3.618        |
| After 100 cycles | 7.71            | 4.007        |
| After 200 cycles | 9.001           | 7.238        |
| After 500 cycles | 9.322           | 10.71        |

## References

1. M. Graczyk-Zajac, D. Vrankovic, P. Waleska, C. Hess, P. V. Sasikumar, S. Lauterbach, H.-J. Kleebe and G. D. Sorarù, *Journal of Materials Chemistry A*, 2018, **6**, 93-103.
2. P. Wu, X. Guo, Z. Su, C. Liu, S. Chen, Z. Zheng and A. Liu, *Chemical Engineering Journal*, 2022, **446**.
3. Y. Xia, S. Cai, C. Lu, H. Huang, Y. Gan, J. Zhang, C. Liang, Z. Xiao and W. Zhang, *Journal of Alloys and Compounds*, 2020, **816**.
4. J. Wang, C. Luo, T. Gao, A. Langrock, A. C. Mignerey and C. Wang, *Small*, 2015, **11**, 473-481.
5. X. Huang, B. Christopher, S. Chai, X. Xie, S. Luo, S. Liang and A. Pan, *ACS Applied Energy Materials*, 2021, **4**, 1677-1686.
6. X. Lin, Y. Dong, X. Liu, X. Chen, A. Li and H. Song, *Chemical Engineering Journal*, 2022, **428**.
7. Z. Wu, X. Cheng, D. Tian, T. Gao, W. He and C. Yang, *Chemical Engineering Journal*, 2019, **375**.
8. H. Hong, W. Liu, M. Zhang, Y. Wang and Y. Chen, *Journal of Alloys and Compounds*, 2021, **857**.
9. D. Knozowski, M. Graczyk-Zajac, G. Trykowski and M. Wilamowska-Zawlocka, *Materials (Basel)*, 2020, **13**.
10. M. Ma, H. Wang, L. Xiong, S. Huang, X. Li and X. Du, *Carbon*, 2022, **186**, 273-281.
11. Z. Sang, Z. Zhao, D. Su, P. Miao, F. Zhang, H. Ji and X. Yan, *Journal of Materials Chemistry A*, 2018, **6**, 9064-9073.
12. G. Shao, D. A. H. Hanaor, J. Wang, D. Kober, S. Li, X. Wang, X. Shen, M. F. Bekheet and A. Gurlo, *Acs Applied Materials & Interfaces*, 2020, **12**, 46045-46056.
13. J. Kaspar, M. Graczyk-Zajac, S. Lauterbach, H.-J. Kleebe and R. Riedel, *Journal of Power Sources*, 2014, **269**, 164-172.
14. D. Vrankovic, M. Graczyk-Zajac, C. Kalcher, J. Rohrer, M. Becker, C. Stabler, G. Trykowski, K. Albe and R. Riedel, *ACS Nano*, 2017, **11**, 11409-11416.
15. Z. Wu, W. Lv, X. Cheng, J. Gao, Z. Qian, D. Tian, J. Li, W. He and C. Yang, *Chemistry-a European Journal*, 2019, **25**, 2604-2609.
16. A. Tolosa, M. Widmaier, B. Krüner, J. M. Griffin and V. Presser, *Sustainable Energy & Fuels*, 2018, **2**, 215-228.
17. K. Xia, L. Qu, X. Liu, H. Han, Z. Hou, Y. Li and S. Deng, *Applied Surface Science*, 2020, **506**.
18. D. Knozowski, P. Vallachira Warriam Sasikumar, P. Madajski, G. Blugan, M. Gazda, N. Kovalska and M. Wilamowska-Zawlocka, *Nanomaterials (Basel)*, 2022, **12**.
